# Supplementary material for: Antagonistic Potentiality of Actinomycete-Derived Extract with Anti-Biofilm, Antioxidant, and Cytotoxic Capabilities as a Natural Combating Strategy for Multidrug-Resistant ESKAPE Pathogens
Source: PubMed Central journal article supplement (PMC9896001; doi:10.4014/jmb.2211.11026), 2022-12-23
Supplement: jmb-33-1-61-supple.pdf [file jmb-33-1-61-supple.pdf]

**Table S1. Distribution of the bacterial pathogens within different clinical specimens.**

| No. | Clinical specimens | Isolate code | No. of pathogens | Gram stain reaction |             |
|-----|--------------------|--------------|------------------|---------------------|-------------|
|     |                    |              |                  | Gram (+) ve         | Gram (-) ve |
| 1   | Urine cultures     | UC           | 40               | 16                  | 24          |
| 2   | Abscess swabs      | AS           | 64               | 26                  | 38          |
| 3   | Sputum cultures    | SC           | 8                | 4                   | 4           |
| 4   | Wound swabs        | WS           | 20               | 6                   | 14          |
| 5   | Tooth swabs        | TS           | 12               | 5                   | 7           |
| 6   | Throat swabs       | TS           | 16               | 7                   | 9           |

**Table S2(A). Antibiotic resistance pattern of the selected Gram-negative isolates.**

| Isolates \ Antibiotics | Ampicillin | Ampicillin/Sulbactam | Piperacillin/Tazobactam | Cefazolin | Cefoxitin | Ceftazidime | Ceftriaxone | Cefepime | Meropenem | Amikacin | Gentamicin | Tobramycin | Ciprofloxacin | Levofloxacin | Nitrofurantoin | Trimethoprim/<br>Sulfamethoxazole |
|------------------------|------------|----------------------|-------------------------|-----------|-----------|-------------|-------------|----------|-----------|----------|------------|------------|---------------|--------------|----------------|-----------------------------------|
| UC11                   | R          | R                    | R                       | R         | R         | R           | R           | R        | R         | R        | R          | R          | R             | R            | R              | R                                 |
| SC6                    | R          | R                    | R                       | R         | R         | R           | R           | R        | R         | R        | R          | R          | R             | R            | R              | S                                 |
| UC22                   | R          | R                    | S                       | R         | R         | S           | S           | S        | S         | S        | R          | R          | R             | R            | R              | S                                 |
| UC36                   | R          | R                    | S                       | R         | R         | S           | S           | S        | S         | S        | S          | S          | S             | S            | I              | S                                 |

\*R=Resistant, S=Sensitive, I=Intermediate.

**Table S2(B). Antibiotic resistance pattern of the selected Gram-positive isolates.**

| Isolates \ Antibiotics | Benzylpenicillin | Oxacillin | Gentamicin | Ciprofloxacin | Moxifloxacin | Erythromycin | Clindamycin | Linezolid | Teicoplanin | Vancomycin | Tetracycline | Tigecycline | Fusidic acid | Rifampicin | Trimethoprim/<br>Sulfamethoxazole |
|------------------------|------------------|-----------|------------|---------------|--------------|--------------|-------------|-----------|-------------|------------|--------------|-------------|--------------|------------|-----------------------------------|
| WS12                   | R                | R         | R          | R             | R            | S            | I           | S         | R           | S          | R            | S           | R            | S          | R                                 |
| TS7                    | R                | R         | R          | S             | S            | S            | S           | S         | R           | S          | S            | R           | S            | S          | S                                 |

\*R=Resistant, S=Sensitive, I=Intermediate.

**Table S3. Cultural characteristics of actinomycete isolate BOGE18 allowed to be grown on different ISP media.**

| Media                                               | Growth rate | Colony color                           |                                          | Diffusible pigment                   |
|-----------------------------------------------------|-------------|----------------------------------------|------------------------------------------|--------------------------------------|
|                                                     |             | Aerial mycelium                        | Substrate mycelium                       |                                      |
| ISP medium - 1<br>(Liquid tryptone yeast extract)   | Excellent   | Strong reddish orange<br>(ISCC-NBS 35) | Moderate reddish orange<br>(ISCC-NBS 37) | Deep reddish orange<br>(ISCC-NBS 36) |
| ISP medium - 2<br>(Yeast extract-malt extract agar) | Excellent   | Light orange yellow<br>(ISCC-NBS 70)   | Light grayish red<br>(ISCC-NBS 18)       | None                                 |
| ISP medium - 3<br>(Oatmeal agar)                    | Excellent   | Strong reddish orange<br>(ISCC-NBS 35) | Light orange yellow<br>(ISCC-NBS 70)     | None                                 |
| ISP medium - 4<br>(Inorganic salts-starch agar)     | Excellent   | Light grayish red<br>(ISCC-NBS 18)     | Moderate reddish orange<br>(ISCC-NBS 37) | Deep reddish orange<br>(ISCC-NBS 36) |
| ISP medium - 5<br>(Glycerol asparagine agar)        | Weak        | Reddish gray<br>(ISCC-NBS 18)          | No sporulation                           | None                                 |
| ISP medium - 6<br>(Peptone yeast extract iron agar) | Weak        | Reddish gray<br>(ISCC-NBS 18)          | No sporulation                           | None                                 |
| ISP medium - 7<br>(Tyrosine agar)                   | Excellent   | Light orange yellow<br>(ISCC-NBS 70)   | Deep orange<br>(ISCC-NBS 51)             | Strong yellow<br>(ISCC-NBS 34)       |

**Table S4. Physiological and biochemical characteristics of the isolate BOGE18.**

| Characters                                | Growth rate | Characters                              | Growth rate |
|-------------------------------------------|-------------|-----------------------------------------|-------------|
| <b>(1) Physiological characteristics:</b> |             |                                         |             |
| - Utilization of carbon sources:          |             | - Tolerance to NaCl (%):                |             |
| D-glucose                                 | ++          | 1                                       | ++          |
| L-rhamnose                                | ++          | 2                                       | ++          |
| D-xylose                                  | ++          | 3                                       | ++          |
| D-mannitol                                | ++          | 4                                       | ++          |
| Inositol                                  | +           | 5                                       | +           |
| Sucrose                                   | +           | 6                                       | +           |
| L-arabinose                               | ++          | 7                                       | +           |
| Fructose                                  | ++          | 8                                       | Wg          |
| Cellulose                                 | +           | 9                                       | -           |
| - Utilization of nitrogen sources:        |             | - Tolerance to growth inhibitors (w/v): |             |
| L-asparagine                              | -           | Sodium azide (0.01%)                    | -           |
| L-cysteine                                | +           | Phenol (0.1%)                           | -           |
| L-valine                                  | -           | Crystal violet (0.0001%)                | +           |
| L-threonine                               | ++          | Potassium tellurite (0.001%)            | -           |
| L-phenylalanine                           | +           | - Sensitivity to antibiotics:           |             |
| L-methionine                              | ++          | Penicillin G (10 IU)                    | +           |
| L-histidine                               | ++          | Rifampicin 50 (µg/mL)                   | -           |
| L-arginine                                | ++          | Neomycin 50 (µg/mL)                     | -           |
| - Growth at different temperature (°C):   |             | <b>(2) Biochemical characteristics:</b> |             |
| 10                                        | -           | - Hydrolysis of:                        |             |
| 20                                        | +           | Starch                                  | +           |
| 30                                        | +++         | Lipid                                   | +           |
| 40                                        | +           | Gelatin                                 | +           |
| 50                                        | +           | Casein                                  | -           |
| 60                                        | -           | Urea                                    | +           |
| - Growth at different pH values:          |             | - Degradation of:                       |             |
| 4                                         | -           | Tyrosine                                | +           |
| 5                                         | +           | Lecithin                                | -           |
| 6                                         | +           | Pectin                                  | +           |
| 7                                         | ++          | Esculin                                 | -           |
| 8                                         | +++         | Citrate                                 | +           |
| 9                                         | Wg          | Nitrate reduction                       | -           |
| 10                                        | -           | H <sub>2</sub> S production             | -           |

“-” Negative, “Wg” weak growth, “+” Moderate, “++” Good, “+++” Abundant growth.

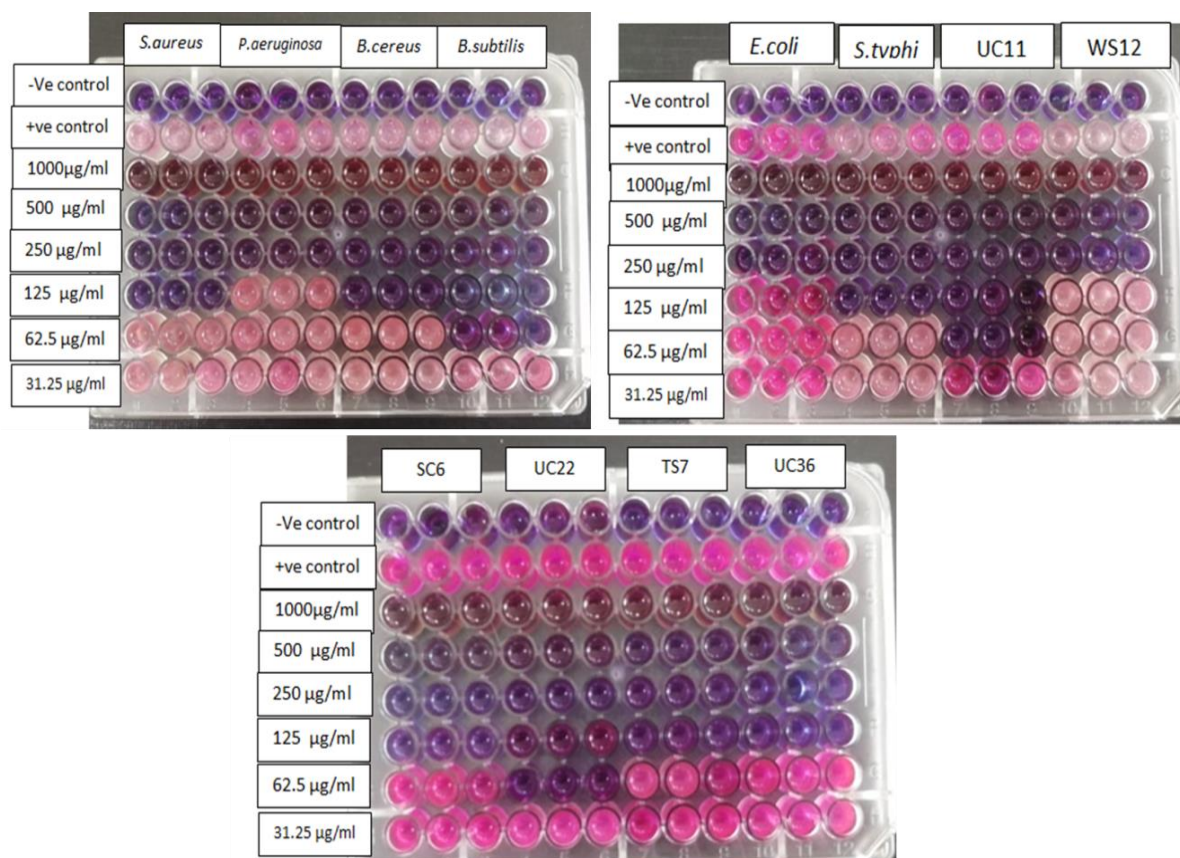

**Fig. S1. Broth microdilution assay plates for MICs of *S. lienomycini* BOGE18 extract against the standard and MDR-ESAPE pathogens.** These plates after 24 h in MHB resazurin assay [pink colour indicates growth and blue means inhibition of growth. 1<sup>st</sup> row (-ve) = Negative or sterility control (MHB + sterile distilled water + indicator) without bacteria; 2<sup>nd</sup> row (+ve)=Positive Control (MHB + bacterial suspension + indicator) without the extract; 3<sup>rd</sup> to 8<sup>th</sup> row (MHB + indicator + tested bacterial organism + *S. lienomycini* BOGE18 extract), the highest concentration in 3<sup>rd</sup> row then double fold dilution until the last row.

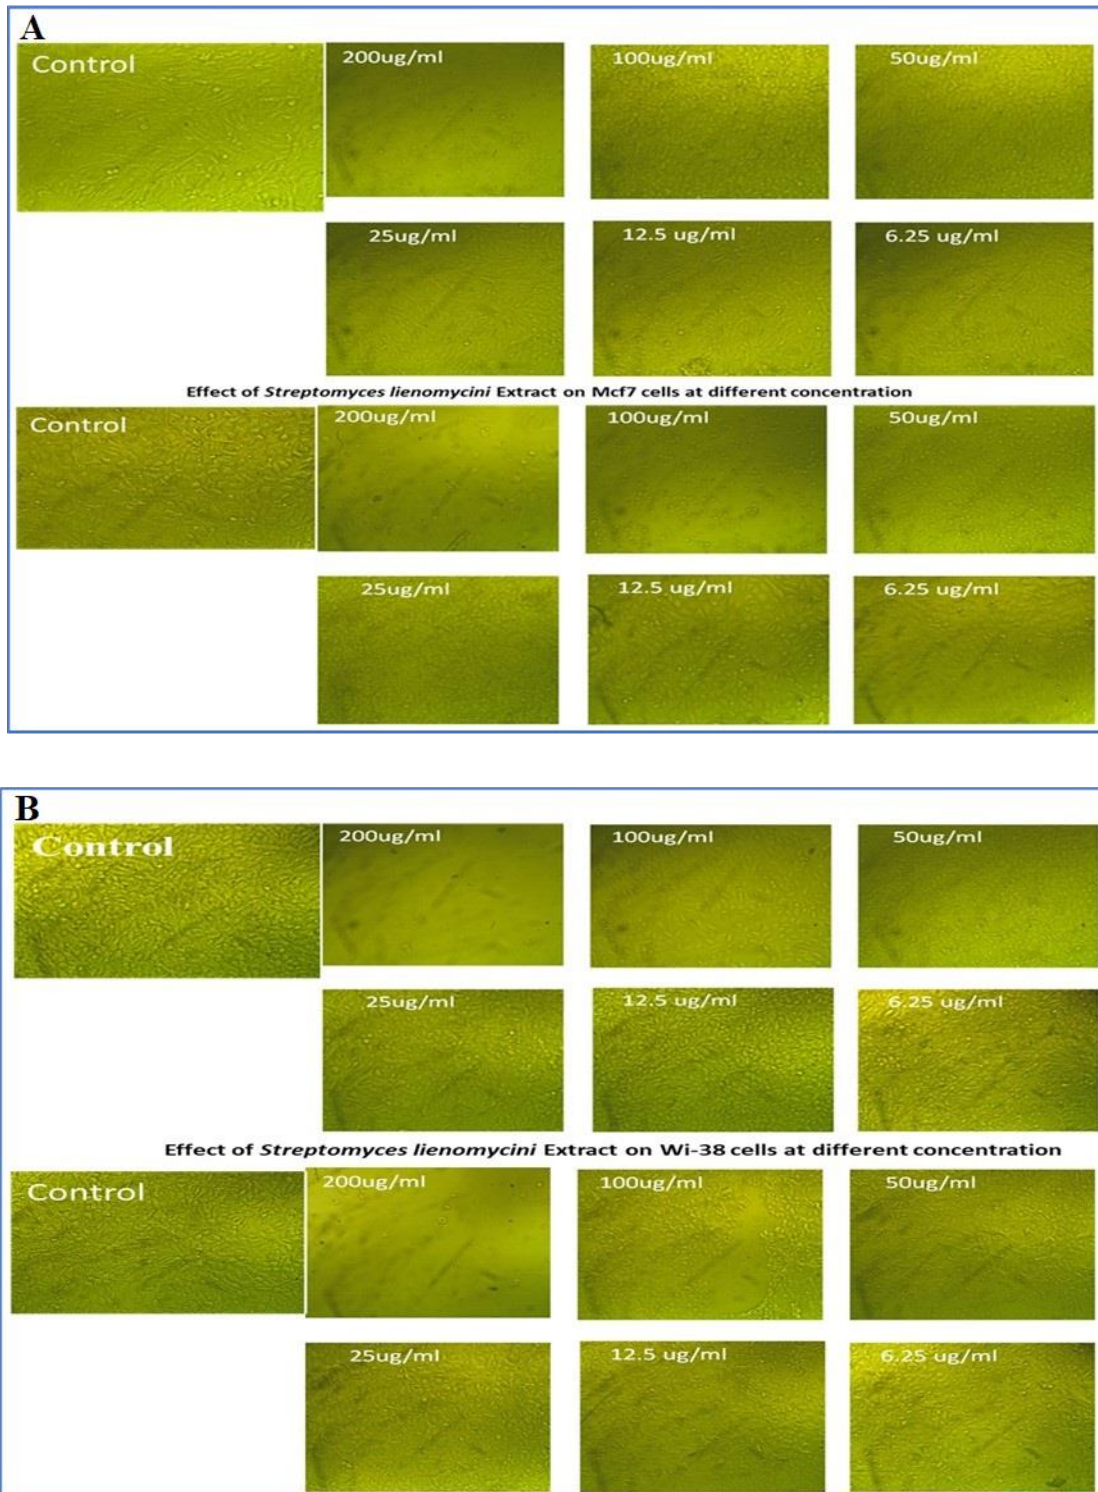

**Fig. S2.** Morphological changes induced by *S. lienomycini* BOGE18 extract in human cancer (MCF-7 and HePG2) cells (A), and normal (Wi-38 and VERO) cells (B).

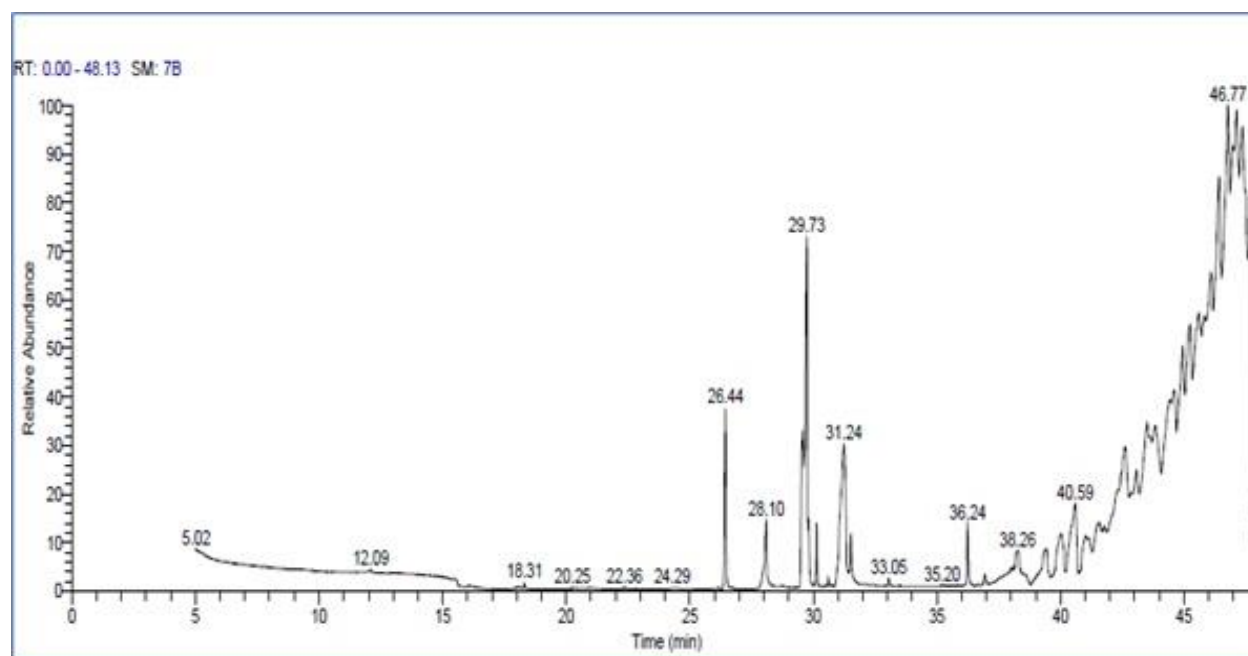

**Fig. S3. GC-MS chromatogram of *S. lienomycini* BOGE18-derived extract.**

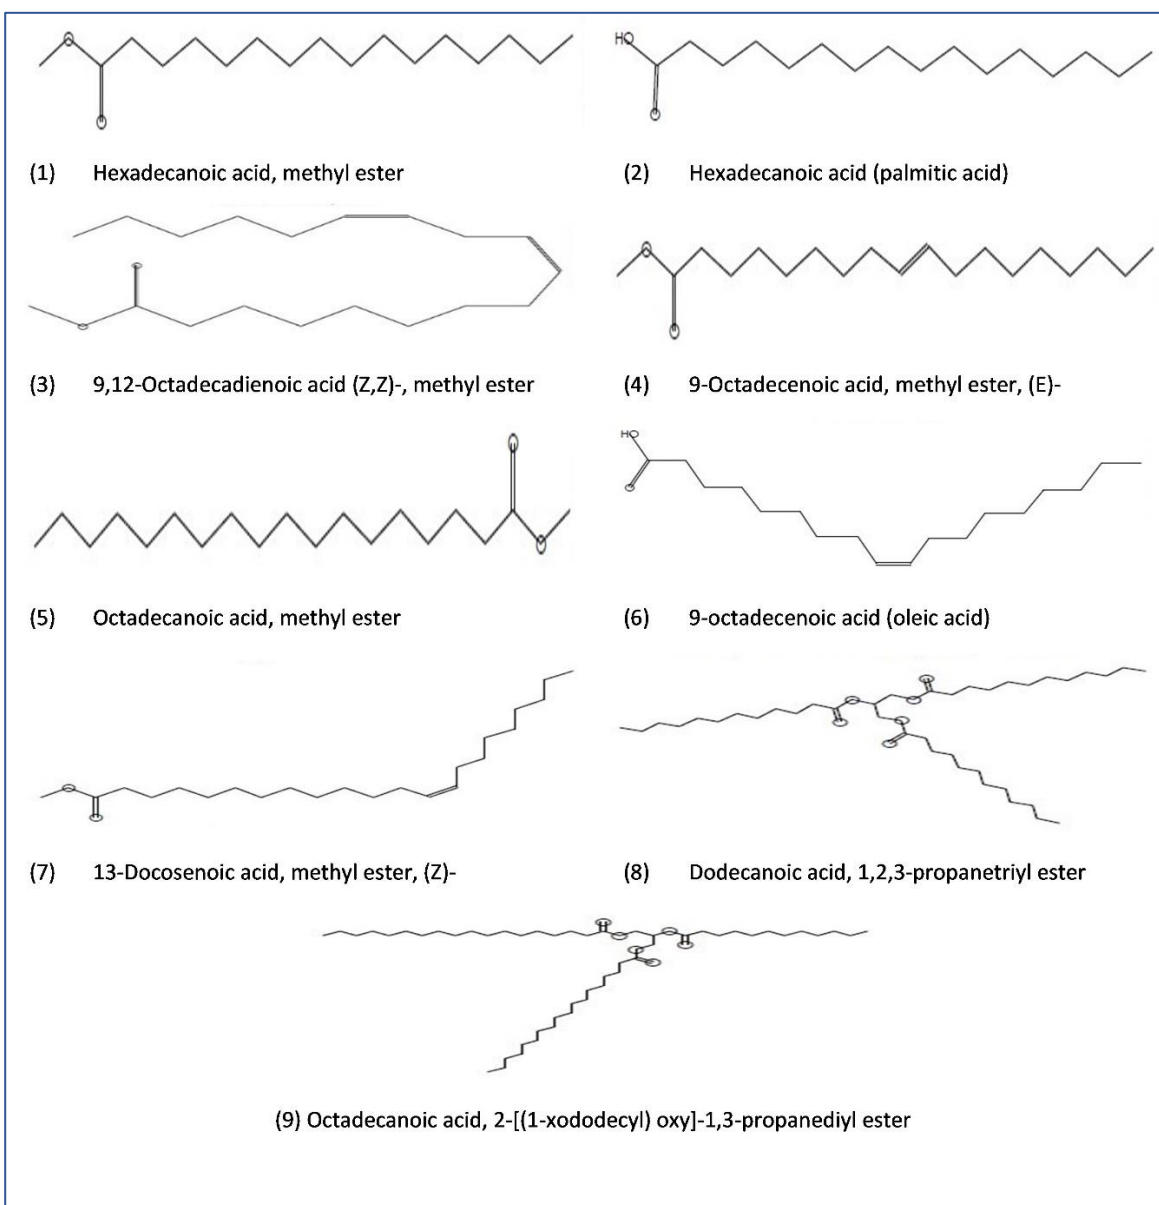

**Fig. S4. The molecular structures of the identified compounds from GC–MS analysis of *S. lienomycini* BOGE18-derived extract.**
